# Supplementary material for: Complementary iTRAQ-based proteomic and RNA sequencing-based transcriptomic analyses reveal a complex network regulating pomegranate (Punica granatum L.) fruit peel colour
Source: PubMed Central journal article supplement (PMC6098015; doi:10.1038/s41598-018-30088-3), 2018-08-17
Supplement: 41598_2018_30088_MOESM1_ESM.pdf [file 41598_2018_30088_MOESM1_ESM.pdf]

**Complementary iTRAQ-based proteomic and RNA sequencing-based transcriptomic  
analyses reveal a complex network regulating pomegranate (*Punica granatum* L.) fruit peel  
colour**

Xiang Luo\*, Da Cao\*, Haoxian Li\*, Diguang Zhao, Hui Xue, Juan Niu, Lina Chen, Fuhong Zhang  
& Shangyin Cao

Zhengzhou Fruit Research Institute, Chinese Academy of Agricultural Sciences, Zhengzhou  
450009, P. R. China

\*These authors contributed equally to this work.

Correspondence and requests for materials should be addressed to S.C

E-mail: s.y.cao@163.com

Zhengzhou Fruit Research Institute, Chinese Academy of Agricultural Sciences, Zhengzhou  
450009, P. R. China

Tel: +86-0371-65330990

Fax: +86-0371-65330963

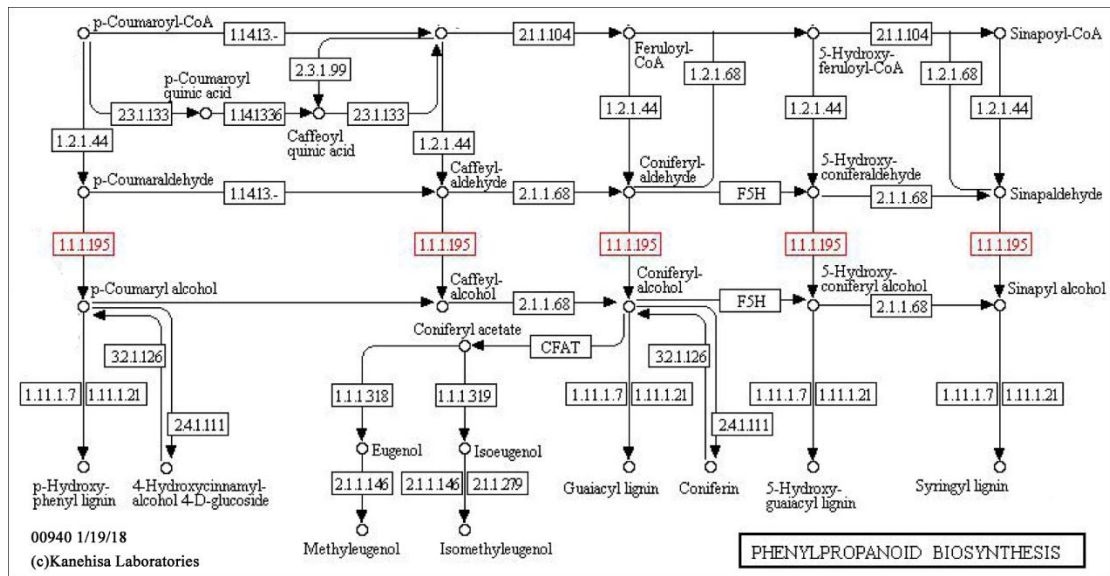

**Supplementary Figure S1.** Analysis of cinnamyl-alcohol dehydrogenase functions related to phenylpropanoid biosynthesis with KEGG developed by Kanehisa Laboratories<sup>45</sup>.

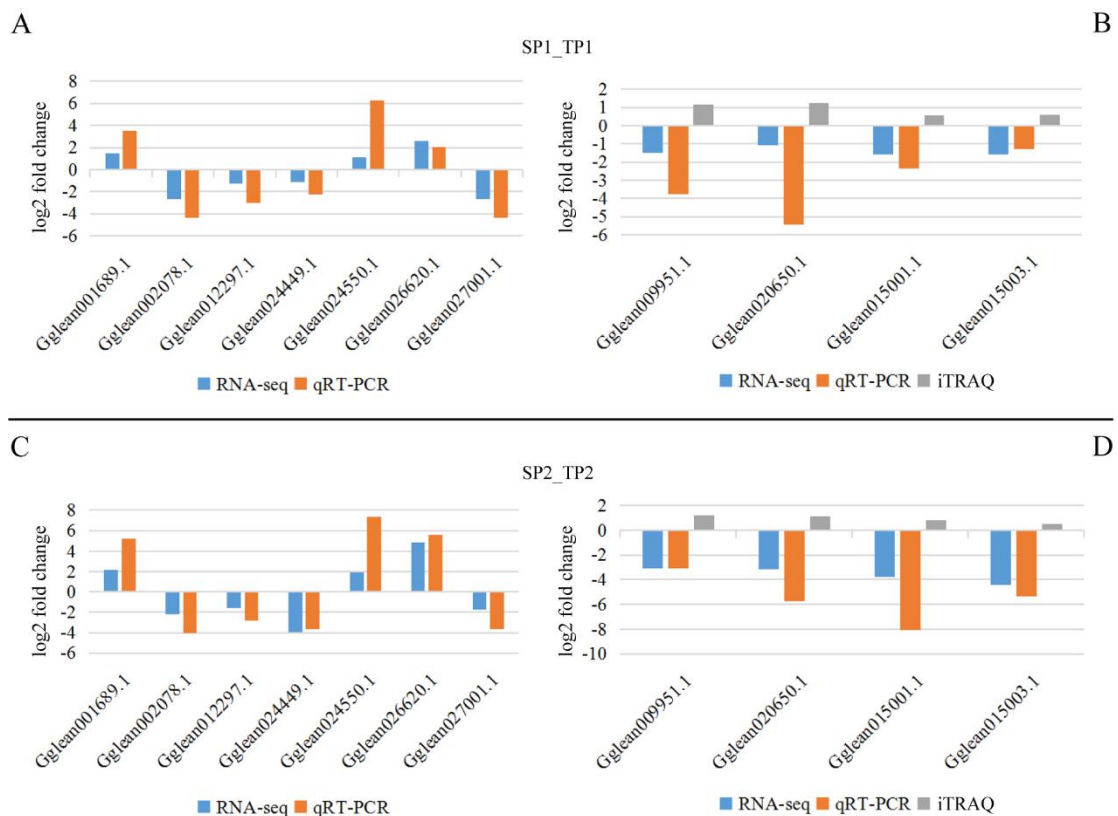

**Supplementary Figure S2.** qRT-PCR analysis of selected genes in (A and B) SP1\_TP1 and (C and D) SP2\_TP2.



**Supplementary Table S1.** Filtered iTRAQ and RNA sequencing data.

| Sample | iTRAQ         |               |                |         | RNA-seq         |                   |                     |                        |
|--------|---------------|---------------|----------------|---------|-----------------|-------------------|---------------------|------------------------|
|        | Total spectra | Unique Spetra | Unique Peptide | Protein | Total Raw Reads | Total Clean Reads | Total Mapping Ratio | Uniquely Mapping Ratio |
| SP1    | 237421        | 54346         | 18407          | 5357    | 64852984        | 37431229          | 45.23%              | 37.34%                 |
| SP2    | 237421        | 54346         | 18407          | 5357    | 61986029        | 35631903          | 44.06%              | 36.22%                 |
| TP1    | 237421        | 54346         | 18407          | 5357    | 59988046        | 34677616          | 42.25%              | 34.53%                 |
| TP2    | 237421        | 54346         | 18407          | 5357    | 67458765        | 38763711          | 41.89%              | 33.33%                 |

**Supplementary Table S3.** Common DAPs among the four candidate pathways.

| Pathway                                               | Common DEPs                  |
|-------------------------------------------------------|------------------------------|
| Anthocyanin biosynthesis                              | Gglean022014.1               |
|                                                       | Gglean030887.1               |
| Stilbenoid, diarylheptanoid and gingerol biosynthesis | Gglean020115.1               |
|                                                       | Gglean017092.1               |
|                                                       | Gglean017092.1               |
|                                                       | Gglean017092.1               |
|                                                       | Gglean017162.1               |
|                                                       | Gglean022299.1               |
|                                                       | Gglean030413.1               |
| Flavonoid biosynthesis                                | Gglean021885.1               |
|                                                       | Gglean002595.1               |
|                                                       | Gglean024933.1               |
|                                                       | Gglean000166.1               |
|                                                       | Gglean024550.1               |
|                                                       | Gglean024451.1               |
|                                                       | Gglean009951.1               |
|                                                       | Gglean002270.1               |
|                                                       | Gglean020650.1               |
|                                                       | Phenylpropanoid biosynthesis |
| Gglean015001.1                                        |                              |
| Gglean030344.1                                        |                              |
| Gglean004667.1                                        |                              |
| Gglean015223.1                                        |                              |
| Gglean005438.1                                        |                              |
| Gglean015003.1                                        |                              |
| Gglean002739.1                                        |                              |
| Gglean026319.1                                        |                              |
| Gglean006509.1                                        |                              |
| Gglean008923.1                                        |                              |
| Gglean004749.1                                        |                              |
| Gglean015152.1                                        |                              |
| Gglean017305.1                                        |                              |
| Gglean025624.1                                        |                              |
| Gglean026354.1                                        |                              |

**Supplementary Table S4.** Common DEGs among the four candidate pathways.

| Pathway                  | Common DEGs           |
|--------------------------|-----------------------|
| Anthocyanin biosynthesis | <i>Gglean024784.1</i> |
|                          | <i>Gglean011259.1</i> |
|                          | <i>Gglean024783.1</i> |
|                          | <i>Gglean019130.1</i> |

|                                                       |                       |
|-------------------------------------------------------|-----------------------|
|                                                       | <i>Gglean021842.1</i> |
|                                                       | <i>Gglean030299.1</i> |
|                                                       | <i>Gglean017094.1</i> |
|                                                       | <i>Gglean019885.1</i> |
|                                                       | <i>Gglean017523.1</i> |
|                                                       | <i>Gglean022291.1</i> |
|                                                       | <i>Gglean025205.1</i> |
|                                                       | <i>Gglean019884.1</i> |
|                                                       | <i>Gglean015246.1</i> |
|                                                       | <i>Gglean015968.1</i> |
| Stilbenoid, diarylheptanoid and gingerol biosynthesis | <i>Gglean018889.1</i> |
|                                                       | <i>Gglean015686.1</i> |
|                                                       | <i>Gglean017252.1</i> |
|                                                       | <i>Gglean020272.1</i> |
|                                                       | <i>Gglean027026.1</i> |
|                                                       | <i>Gglean004433.1</i> |
|                                                       | <i>Gglean016885.1</i> |
|                                                       | <i>Gglean024512.1</i> |
|                                                       | <i>Gglean022304.1</i> |
|                                                       | <i>Gglean000381.1</i> |
|                                                       | <i>Gglean020112.1</i> |
|                                                       | <i>Gglean013382.1</i> |
|                                                       | <i>Gglean015692.1</i> |
|                                                       | <i>Gglean026629.1</i> |
|                                                       | <i>Gglean009951.1</i> |
|                                                       | <i>Gglean020650.1</i> |
|                                                       | <i>Gglean012297.1</i> |
|                                                       | <i>Gglean024550.1</i> |
|                                                       | <i>Gglean024449.1</i> |
|                                                       | <i>Gglean025015.1</i> |
|                                                       | <i>Gglean001689.1</i> |
|                                                       | <i>Gglean026620.1</i> |
|                                                       | <i>Gglean002570.1</i> |
|                                                       | <i>Gglean002078.1</i> |
|                                                       | <i>Gglean006664.1</i> |
|                                                       | <i>Gglean027001.1</i> |
|                                                       | <i>Gglean000166.1</i> |
| Flavonoid biosynthesis                                | <i>Gglean002629.1</i> |
|                                                       | <i>Gglean018019.1</i> |
|                                                       | <i>Gglean014037.1</i> |
|                                                       | <i>Gglean015001.1</i> |
|                                                       | <i>Gglean015003.1</i> |
| Phenylpropanoid biosynthesis                          | <i>Gglean026937.1</i> |
|                                                       | <i>Gglean007009.1</i> |

*Gglean004745.1*  
*Gglean008923.1*  
*Gglean019078.1*  
*Gglean018745.1*  
*Gglean014679.1*  
*Gglean016279.1*  
*Gglean025214.1*  
*Gglean002744.1*  
*Gglean008959.1*  
*Gglean004943.1*  
*Gglean004996.1*  
*Gglean028708.1*  
*Gglean031223.1*  
*Gglean015153.1*  
*Gglean010746.1*  
*Gglean004579.1*  
*Gglean031042.1*  
*Gglean027772.1*  
*Gglean008643.1*  
*Gglean013008.1*  
*Gglean022575.1*  
*Gglean028815.1*  
*Gglean024774.1*  
*Gglean018674.1*  
*Gglean007582.1*  
*Gglean021760.1*  
*Gglean026132.1*  
*Gglean026319.1*  
*Gglean003999.1*  
*Gglean004749.1*  
*Gglean007149.1*  
*Gglean016128.1*  
*Gglean028143.1*  
*Gglean025275.1*  
*Gglean019365.1*  
*Gglean016790.1*  
*Gglean017886.1*  
*Gglean011165.1*  
*Gglean022649.1*  
*Gglean026442.1*  
*Gglean013351.1*  
*Gglean005187.1*  
*Gglean004396.1*  
*Gglean026874.1*

*Gglean004746.1*  
*Gglean003647.1*  
*Gglean029542.1*  
*Gglean019513.1*  
*Gglean010569.1*  
*Gglean029864.1*  
*Gglean029861.1*  
*Gglean023909.1*

**Supplementary Table S5.** Primers of mRNAs used in this study.

| Primer ID      | Forward primers (5'to3') | Reverse primer (5'to3') |
|----------------|--------------------------|-------------------------|
| Gglean001689.1 | ACTACACAATGGTCGAGCCG     | CATGAAGTTGCTGCGCTTCC    |
| Gglean002078.1 | CAATGCACAGGGCAATCACG     | TTGACCGTCTTGTAGAGCCC    |
| Gglean009951.1 | CTACCGGACTCTGATGGTGC     | ACATGTTCCCGTACTCGCTC    |
| Gglean012297.1 | ATCTTCTGGATCGCACACCC     | AGGATGAAGAGGACGCAAGC    |
| Gglean015001.1 | CAGCCCACCTATAATGGCGT     | GCCTTACCGAATTGACCGC     |
| Gglean015003.1 | ATATCGAGACGGTCACCCCT     | AGCTTAGATGTCTTGCCCGC    |
| Gglean020650.1 | GGCCATAGTCTACCCCTCA      | CGCTAGCTCGAGGTCCCTAC    |
| Gglean024449.1 | TTGGAGGACATGTTCGTCGG     | TTGCGGCCATTAACGAGTTC    |
| Gglean024550.1 | GCAACCCGAAGGCAATCTTC     | ATGTTCTTTGGAGGCCGGAG    |
| Gglean026620.1 | CGAGATCCTCAGCAACGGAA     | TCCTGAAGAGCTTGTGCTCG    |
| Gglean027001.1 | TGCCCAAGTCAATCGGCTAC     | TCCAATCGAAGGAGTGCAG     |
